# Supplementary material for: Novel Alzheimer risk genes determine the microglia response to amyloid‐β but not to TAU pathology
Source: PubMed Central journal article supplement (PMC7059012; doi:10.15252/emmm.201910606), 2020-01-17
Supplement: EMMM-12-e10606-s001.pdf [file EMMM-12-e10606-s001.pdf]

# 1 Appendix to Sierksma et al. 2019

## 2 Table of content

### 3 1. Appendix Figures:

- 4 1. Appendix Fig.S1: Two APPTg-10M mice have lower transgene expression.
- 5 2. Appendix Fig.S2: Overview of APPTg-based WGCNA modules.
- 6 3. Appendix Fig.S3: Overview of TAUtg-based WGCNA modules.
- 7 4. Appendix Fig.S4: Expression of myeloid marker gene sets across the UMAP of the  
8 single microglia sequencing data.
- 9 5. Appendix Fig.S5: Division of experimental groups within each cluster
- 10 6. Appendix Fig.S6: Examples of the mean z-score distribution of 10,000 randomly  
11 sampled gene sets with equal sizes to the gene set of interest.

### 12 2. Appendix Tables

- 13 1. Appendix Table S1: Overview of the number of Marioni-based GWAS genes at  
14 different p-value cutoffs.
- 15 2. Appendix Table S2: Overlap between genes within a WGCNA module and the cell-  
16 type specific gene sets.
- 17 3. Appendix Table S3: Results from the SuperExactTest for overlaps between multiple  
18 gene sets.

19

20 Appendix Figures and Figure Legends

21

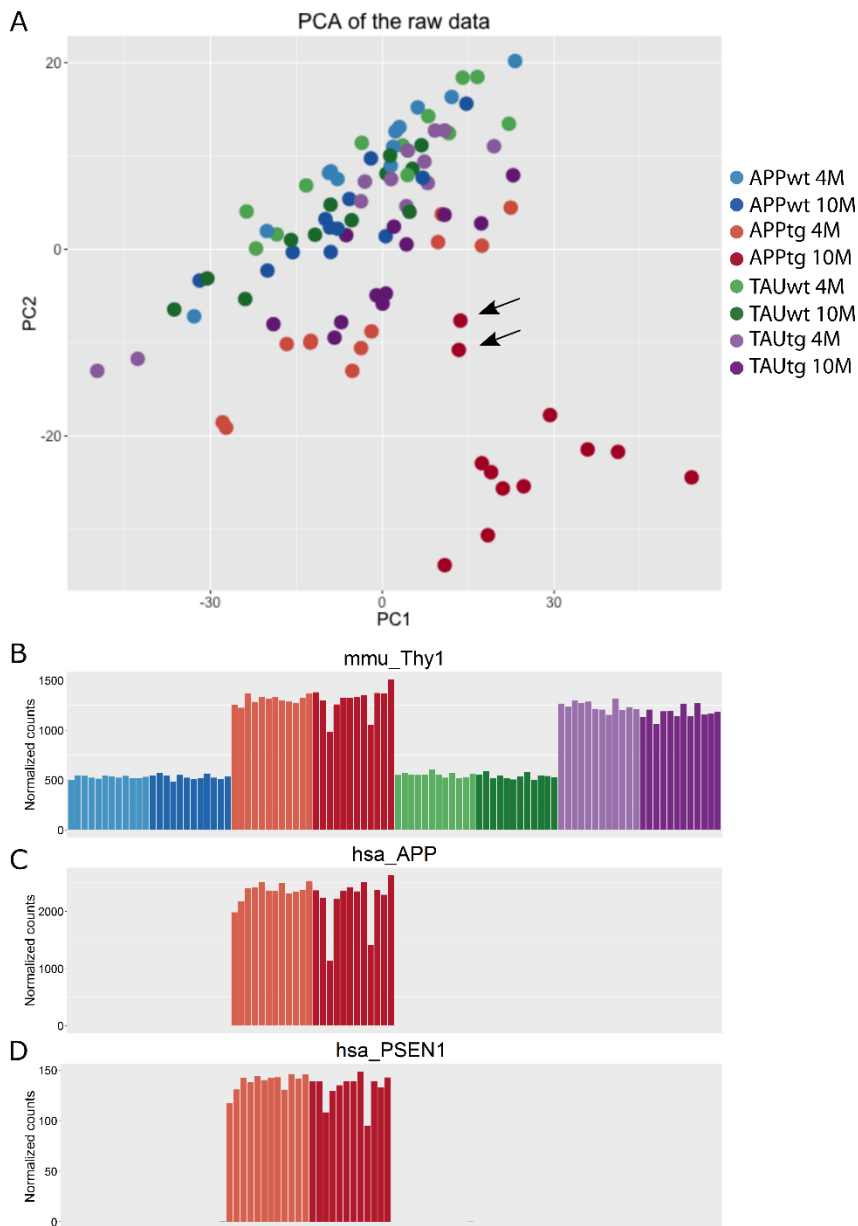

22

23

24 Appendix Fig.S1: Two APPTg-10M mice have lower transgene expression. A: The first 2 principle  
25 components of the PCA plot of the log<sub>2</sub>(raw reads from Feature Counts +1) demonstrate that 2 APPTg-  
26 10M mice cluster more towards the APPTg-4M mice (see arrows). B-D: These two mice have decreased  
27 expression of transgenes mmu-Thy1 (-24%; B), hsa-APP (-46%; C) and hsa-PSEN1 (-26%; D) compared

28 to other APPtg-10M mice. Expression of hsa-MAPT, mmu-App, mmu-Psen1 and mmu-Mapt remained  
29 unaffected (data not shown).  
30

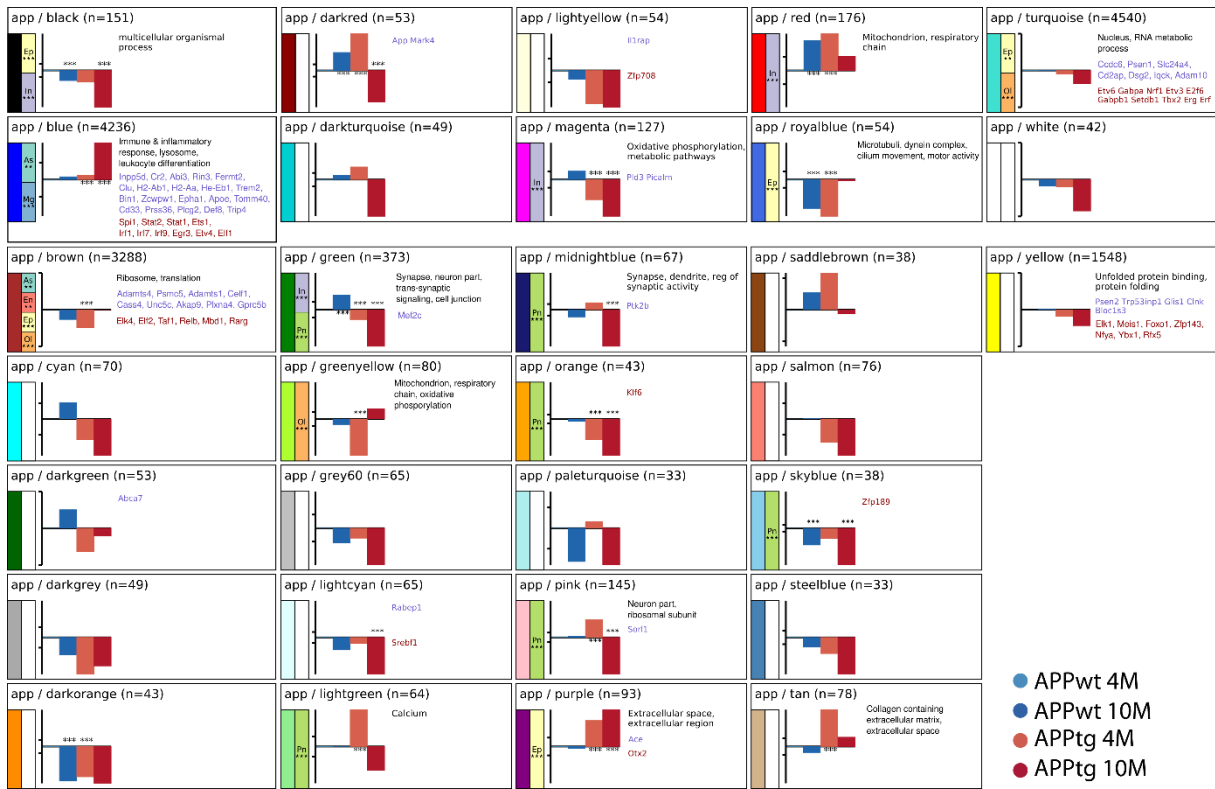

32

33

34 **Appendix Fig.S2: Overview of APPtg-based WGCNA modules.** For each module is indicated the z-score

35 distribution of each experimental group and their bonferroni-adjusted empirically-derived p-values. If

36 significant GO enrichment is observed, the categories are mentioned in the top row (see Datasets EV2

37 and EV3). If the module contains established GWAS genes, they are reported on the middle row (purple

38 font). If there is an enrichment of transcription factor targets of transcription factors expressed in that

39 module, the transcription factors are labeled on the bottom row (red font). If significant enrichment

40 with a specific cell type gene set is observed, this is indicated with the cell-type labeled colored boxes.

41 As: astrocytes; En: Endothelial; Ep: Ependymal; In: interneurons; Mg: microglia; Ol: oligodendrocyte;

42 Pn: Pyramidal neuron.

43

44

45

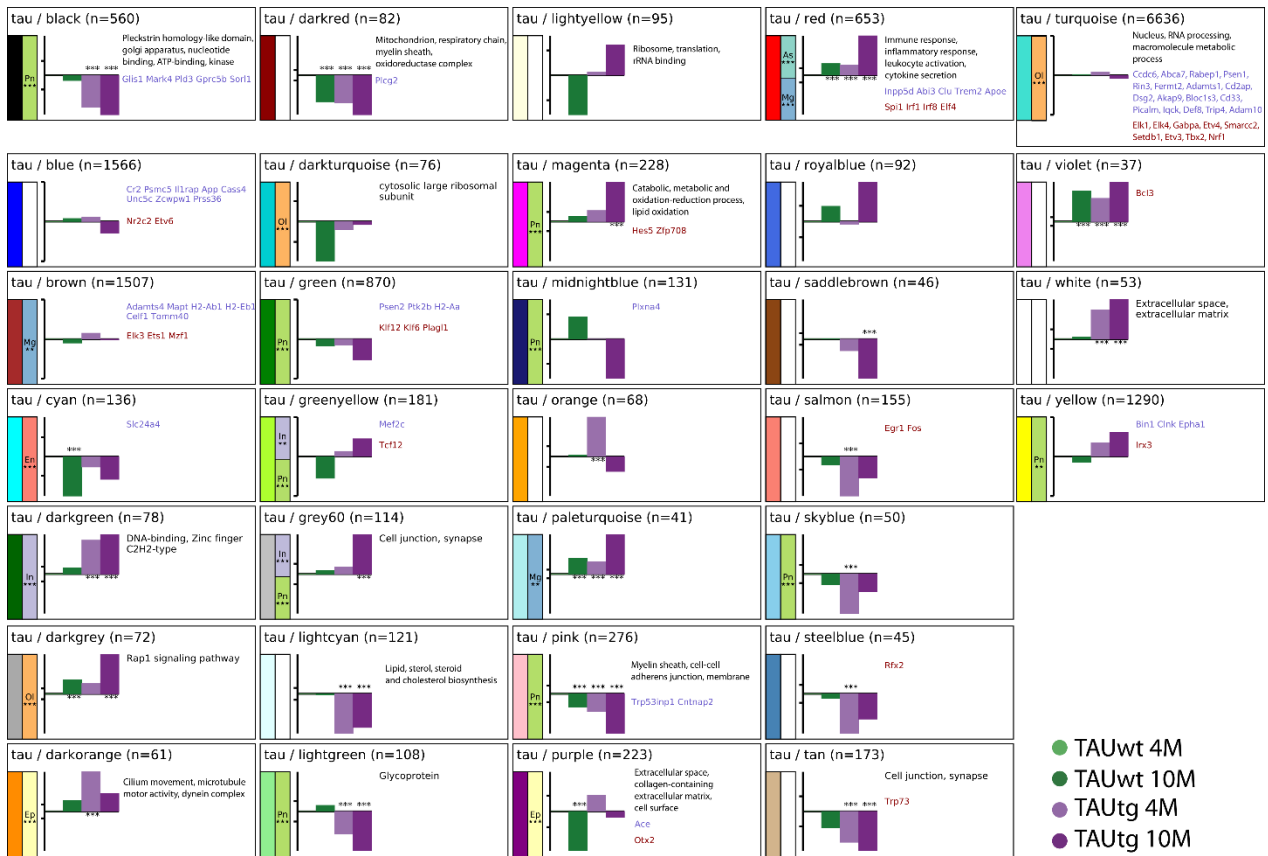

47

48

49 **Appendix Fig.S3: Overview of TAUtg-based WGCNA modules.** For each module is indicated the z-  
 50 score distribution of each experimental group and their bonferroni-adjusted empirically-derived p-  
 51 values. If significant GO enrichment is observed, the categories are mentioned in the top row (see  
 52 Datasets EV2 and EV3). If the module contains established GWAS genes, they are reported on the  
 53 middle row (purple font). If there is an enrichment of transcription factor targets of transcription  
 54 factors expressed in that module, the transcription factors are labeled on the bottom row (red font).  
 55 If significant enrichment with a specific cell type gene set is observed, this is indicated with the cell-  
 56 type labeled colored boxes. As: astrocytes; En: Endothelial; Ep: Ependymal; In: interneurons; Mg:  
 57 microglia; Ol: oligodendrocyte; Pn: Pyramidal neuron.

58

59

60

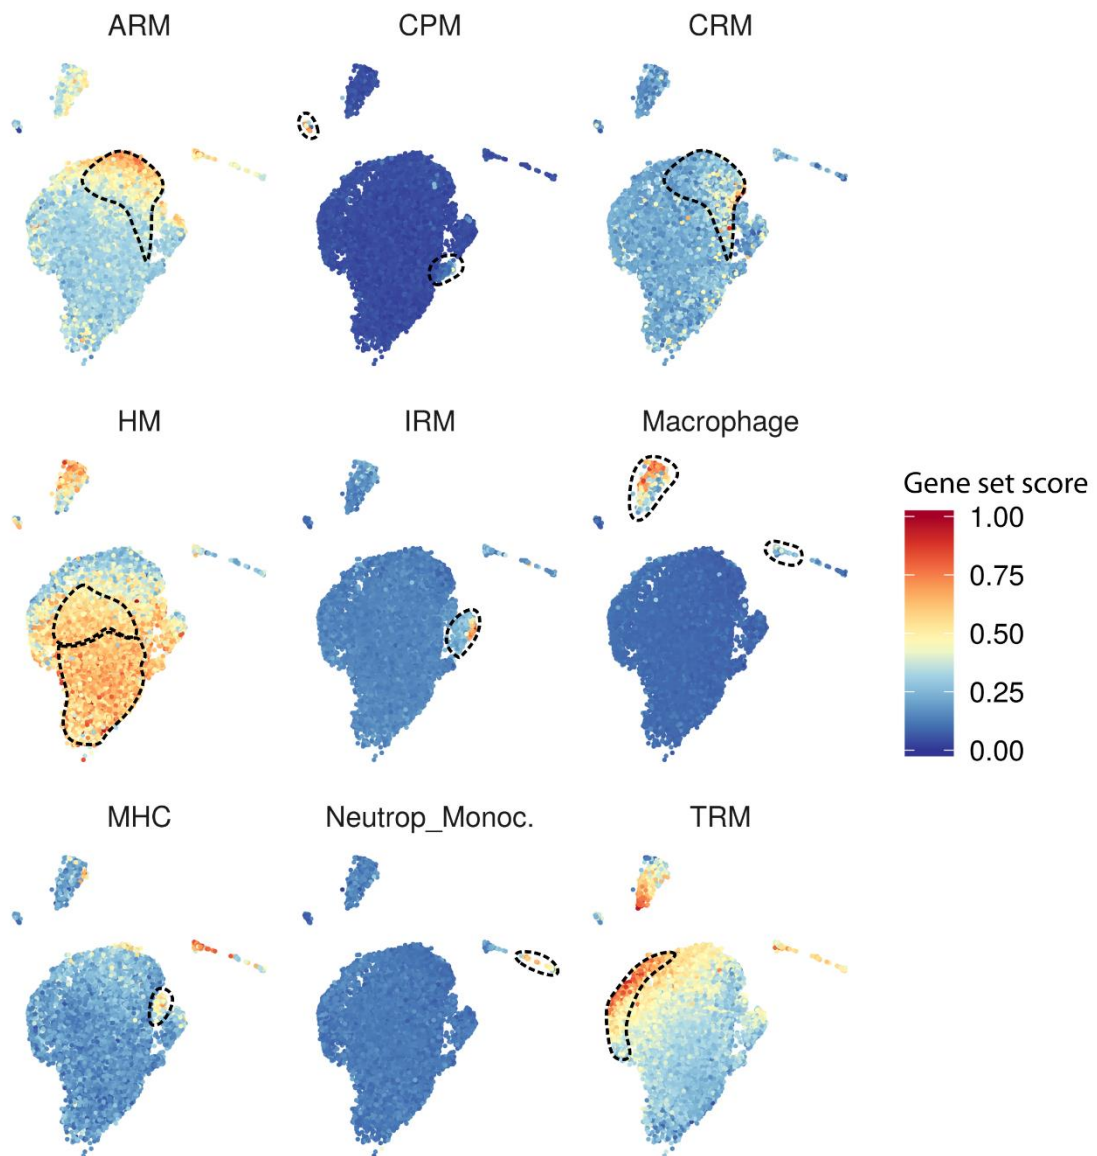

61  
62

63 **Appendix Fig.S4: Expression of myeloid marker gene sets across the UMAP of the single microglia**  
64 **sequencing data.** UMAP plot as in Fig.6A, coloured by a score of the combined level of expression of  
65 publicly available gene sets that characterize distinct microglial states (ARM, CPM, HM, IRM and TRM  
66 from (Sala Frigerio *et al*, 2019); CRM from (Mancuso *et al*, 2019a) which was demonstrated to be a  
67 subset of ARM; Neutrophil-Monocytes and Macrophages from (Friedman *et al*, 2018); a list of MHC  
68 and CPM markers can be found in Dataset EV6). The original clusters from Fig.6A are demarcated.  
69 Scores are scaled from 0 to 1.

70

## Distribution of samples per cell state

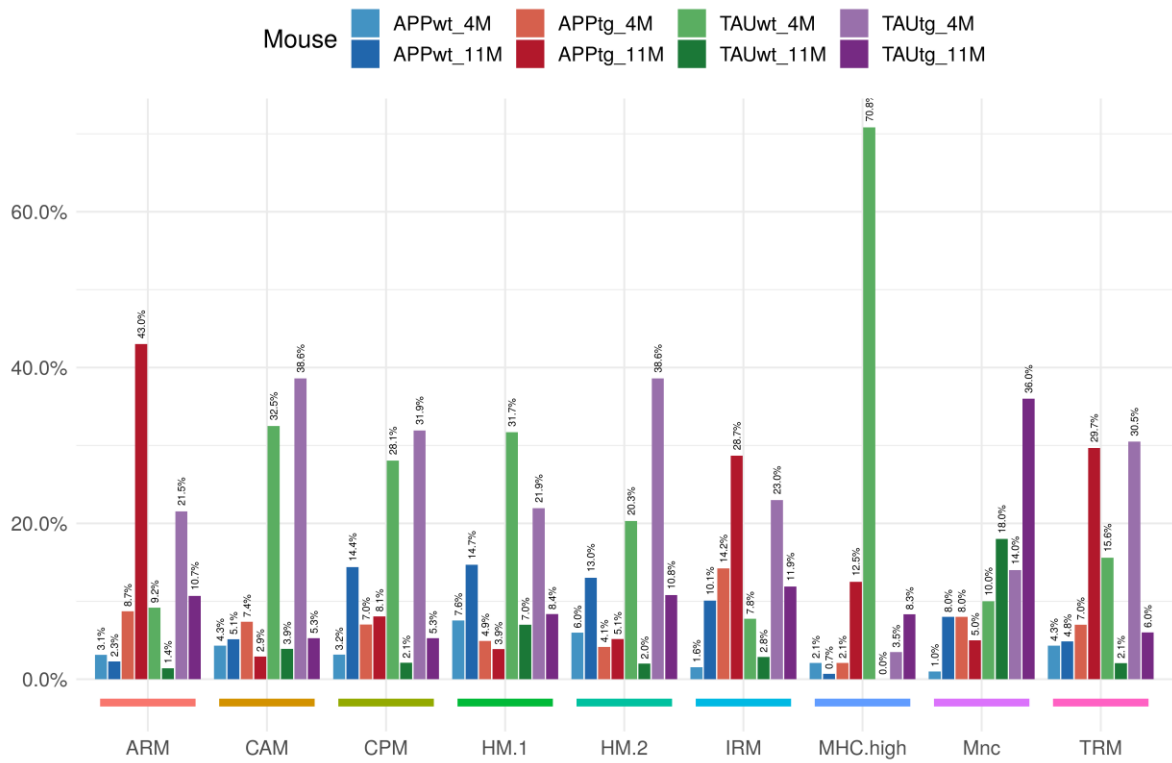

71

72 **Appendix Fig.S5: Division of experimental groups within each cluster.** Per cluster (100%) the  
 73 percentage of cells belonging to each experimental group was calculated.

74

75

76

77

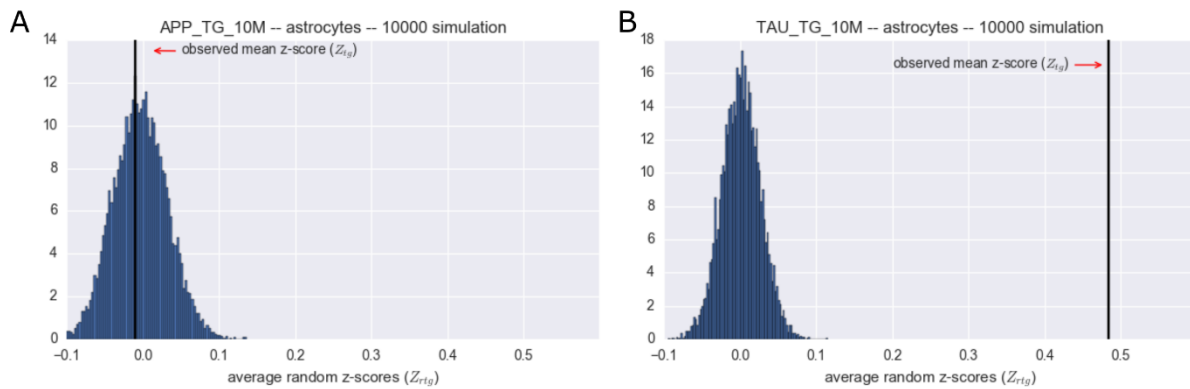

78

79

80 **Appendix Fig.S6: Examples of the mean z-score distribution of 10,000 randomly sampled gene sets**  
81 **with equal sizes to the gene set of interest (e.g. 719 astrocyte genes).** The black vertical line  
82 represents the observed mean z-score  $Z_{tg}$  for APP-TG-10M (A) or TAU-TG-10M mice (B). Its cumulated  
83 distribution function among the normally distributed random z-scores  $Z_{rtg}$  determines the associated  
84 empirical p-value.



85 Appendix Tables

86

87 Appendix Table S1

88 Overview of the number of Marioni-based GWAS genes at different p-value cutoffs. For each cutoff is listed the number of genes in the gene set (marioni),  
 89 how many of these are expressed in mouse hippocampus, out of those how many are in the APPTg-Blue module (marioni\_blue), how many are significantly  
 90 differentially expressed (marioni\_DE), how many are both in APPTg-Blue and significantly differentially expressed (marionin\_DE\_blue) and how many of those  
 91 genes are 'new', i.e. not established AD GWAS genes

| <b>p-value_cutoff</b> | <b>marioni</b> | <b>hippocampus_expressed</b> | <b>marioni_blue</b> | <b>marioni_DE</b> | <b>marioni_DE_blue</b> | <b>new</b> |
|-----------------------|----------------|------------------------------|---------------------|-------------------|------------------------|------------|
| 0.5                   | 9028           | 7274                         | 1956                | 414               | 263                    | 254        |
| 0.1                   | 2738           | 2251                         | 622                 | 142               | 90                     | 81         |
| 0.05                  | 1799           | 1518                         | 439                 | 107               | 72                     | 63         |
| 0.01                  | 771            | 644                          | 200                 | 50                | 37                     | 29         |
| 0.005                 | 572            | 475                          | 158                 | 39                | 31                     | 23         |
| 0.001                 | 314            | 263                          | 88                  | 24                | 18                     | 11         |
| 0.0005                | 255            | 215                          | 72                  | 19                | 15                     | 8          |
| 0.0001                | 168            | 139                          | 52                  | 11                | 9                      | 2          |
| 5.00E-05              | 146            | 120                          | 47                  | 10                | 9                      | 2          |
| 1.00E-05              | 108            | 86                           | 33                  | 9                 | 8                      | 2          |
| 5.00E-06              | 92             | 74                           | 26                  | 8                 | 7                      | 2          |
| 1.00E-06              | 70             | 56                           | 21                  | 5                 | 5                      | 1          |
| 5.00E-07              | 66             | 52                           | 20                  | 5                 | 5                      | 1          |
| 1.00E-07              | 55             | 41                           | 16                  | 4                 | 4                      | 1          |

92

93 Appendix Table S2

94 Overlap, log2 odds ratio (LOR) & Benjamini-Yuketieli-adjusted p-value (BY\_padj) between genes within a WGCNA module and the cell-type specific gene sets  
 95 for astrocytes, endothelial, ependymal, interneurons, microglia, pyramidal neurons, and oligodendrocytes.

96

| Mouse_model | Module       | Cell_type       | LOR  | overlap | genes_in_module | genes_in_celltype | BY_padj     |
|-------------|--------------|-----------------|------|---------|-----------------|-------------------|-------------|
| APPtg       | black        | ependymal       | 1.75 | 17      | 151             | 484               | 7.68E-06    |
| APPtg       | black        | interneuron     | 2.12 | 18      | 151             | 365               | 2.10E-08    |
| APPtg       | blue         | astrocyte       | 0.54 | 70      | 4236            | 240               | 0.014651559 |
| APPtg       | blue         | microglia       | 1.90 | 264     | 4236            | 436               | 1.74E-77    |
| APPtg       | brown        | astrocyte       | 0.54 | 56      | 3288            | 240               | 0.036129912 |
| APPtg       | brown        | endothelial     | 0.46 | 77      | 3288            | 353               | 0.035032181 |
| APPtg       | brown        | ependymal       | 0.54 | 112     | 3288            | 484               | 0.000214844 |
| APPtg       | brown        | oligodendrocyte | 0.55 | 106     | 3288            | 453               | 0.000226802 |
| APPtg       | green        | interneuron     | 1.62 | 28      | 373             | 365               | 1.13E-08    |
| APPtg       | green        | pyramidal       | 1.93 | 65      | 373             | 703               | 2.27E-26    |
| APPtg       | greenyellow  | oligodendrocyte | 2.33 | 14      | 80              | 453               | 2.15E-07    |
| APPtg       | lightgreen   | pyramidal       | 1.73 | 10      | 64              | 703               | 0.003650091 |
| APPtg       | magenta      | interneuron     | 1.63 | 10      | 127             | 365               | 0.005281205 |
| APPtg       | midnightblue | pyramidal       | 2.42 | 18      | 67              | 703               | 8.57E-10    |
| APPtg       | orange       | pyramidal       | 2.08 | 9       | 43              | 703               | 0.000902328 |
| APPtg       | pink         | pyramidal       | 1.65 | 21      | 145             | 703               | 1.69E-06    |
| APPtg       | purple       | ependymal       | 2.32 | 17      | 93              | 484               | 6.79E-09    |
| APPtg       | red          | endothelial     | 2.27 | 23      | 176             | 353               | 6.46E-12    |
| APPtg       | royalblue    | ependymal       | 3.92 | 28      | 54              | 484               | 2.24E-29    |
| APPtg       | skyblue      | pyramidal       | 2.09 | 8       | 38              | 703               | 0.002600416 |
| APPtg       | turquoise    | ependymal       | 0.38 | 134     | 4540            | 484               | 0.014651559 |

|       |               |                 |      |     |      |     |             |
|-------|---------------|-----------------|------|-----|------|-----|-------------|
| APPtg | turquoise     | oligodendrocyte | 0.43 | 130 | 4540 | 453 | 0.003809476 |
| TAUtg | black         | pyramidal       | 1.28 | 57  | 560  | 703 | 7.64E-12    |
| TAUtg | brown         | microglia       | 0.55 | 49  | 1507 | 436 | 0.041686889 |
| TAUtg | cyan          | endothelial     | 1.70 | 11  | 136  | 353 | 0.001592094 |
| TAUtg | darkgreen     | interneuron     | 2.40 | 12  | 78   | 365 | 1.33E-06    |
| TAUtg | darkgrey      | oligodendrocyte | 2.16 | 11  | 72   | 453 | 4.03E-05    |
| TAUtg | darkorange    | ependymal       | 4.09 | 34  | 61   | 484 | 3.05E-37    |
| TAUtg | darkturquoise | oligodendrocyte | 1.98 | 10  | 76   | 453 | 0.000471521 |
| TAUtg | green         | pyramidal       | 0.85 | 60  | 870  | 703 | 5.10E-06    |
| TAUtg | greenyellow   | interneuron     | 1.36 | 11  | 181  | 365 | 0.020015354 |
| TAUtg | greenyellow   | pyramidal       | 1.22 | 18  | 181  | 703 | 0.002622571 |
| TAUtg | grey60        | interneuron     | 1.96 | 12  | 114  | 365 | 6.99E-05    |
| TAUtg | grey60        | pyramidal       | 2.16 | 25  | 114  | 703 | 8.82E-12    |
| TAUtg | lightgreen    | pyramidal       | 2.01 | 21  | 108  | 703 | 9.15E-09    |
| TAUtg | magenta       | astrocyte       | 1.90 | 15  | 228  | 240 | 6.65E-06    |
| TAUtg | midnightblue  | pyramidal       | 1.58 | 18  | 131  | 703 | 3.58E-05    |
| TAUtg | paleturquoise | microglia       | 2.14 | 6   | 41   | 436 | 0.013252102 |
| TAUtg | pink          | pyramidal       | 1.02 | 23  | 276  | 703 | 0.003612158 |
| TAUtg | purple        | ependymal       | 2.24 | 37  | 223  | 484 | 5.35E-19    |
| TAUtg | red           | astrocyte       | 1.10 | 20  | 653  | 240 | 0.003840311 |
| TAUtg | red           | microglia       | 2.06 | 78  | 653  | 436 | 5.33E-35    |
| TAUtg | skyblue       | pyramidal       | 2.03 | 10  | 50   | 703 | 0.000468148 |
| TAUtg | turquoise     | mural           | 0.61 | 69  | 6636 | 155 | 0.013252102 |
| TAUtg | turquoise     | oligodendrocyte | 0.60 | 200 | 6636 | 453 | 9.16E-08    |
| TAUtg | yellow        | pyramidal       | 0.54 | 67  | 1290 | 703 | 0.007579955 |

97

98

99 **Appendix Table S3**

100 Results from the SuperExactTest (Wang et al. 2015) testing the statistical significance of finding overlaps between 2 or more data sets. For every dataset or  
101 combination of datasets it is given what the observed and expected overlaps are, what the fold enrichment is of the observed/expected overlap, the  
102 unadjusted p-value and the Benjamini-Yuketieli adjusted p-value.

103

| <b>Intersected_gene_sets</b> | <b>Observed.Overlap</b> | <b>Expected.Overlap</b> | <b>Fold.enrichment</b> | <b>P.value</b> | <b>BY.padj</b> |
|------------------------------|-------------------------|-------------------------|------------------------|----------------|----------------|
| APPblue & DEint              | 493                     | 155.2                   | 3.2                    | 1.54E-158      | 1.28E-157      |
| gwas & DEint                 | 24                      | 11.5                    | 2.1                    | 0.000597458    | 0.001244704    |
| gwas & APPblue               | 88                      | 61.1                    | 1.4                    | 0.000138617    | 0.000385047    |
| gwas & APPblue & DEint       | 18                      | 2.2                     | 8.0                    | 2.17E-11       | 9.04E-11       |

104

105

106
