# Supplementary material for: Novel Alzheimer risk genes determine the microglia response to amyloid‐β but not to TAU pathology
Source: PubMed Central journal article supplement (PMC7059012; doi:10.15252/emmm.201910606), 2020-01-17
Supplement: EMMM-12-e10606-s002.pdf [file EMMM-12-e10606-s002.pdf]

## Expanded View Figures

**Figure EV1. APPTg and TAUtg mice demonstrate divergent neuronal and glial responses to increasing pathology load.**

Z-score distribution per experimental group for all genes in cell type-specific gene sets as defined by Zeisel *et al* (2015) and SynptomeDB (Pirooznia *et al*, 2012). Boxplots: center line, median; box limits, 25<sup>th</sup>–75<sup>th</sup> quartiles; and whiskers, 1.5× interquartile range. Empirical *P*-values are Bonferroni-adjusted ( $P_{\text{bonf}}$ ) and indicate significant shift in z-score distribution (see Materials and Methods). \*\*\* $P_{\text{bonf}} < 0.001$ , \*\* $P_{\text{bonf}} < 0.01$ , \* $P_{\text{bonf}} < 0.05$ .

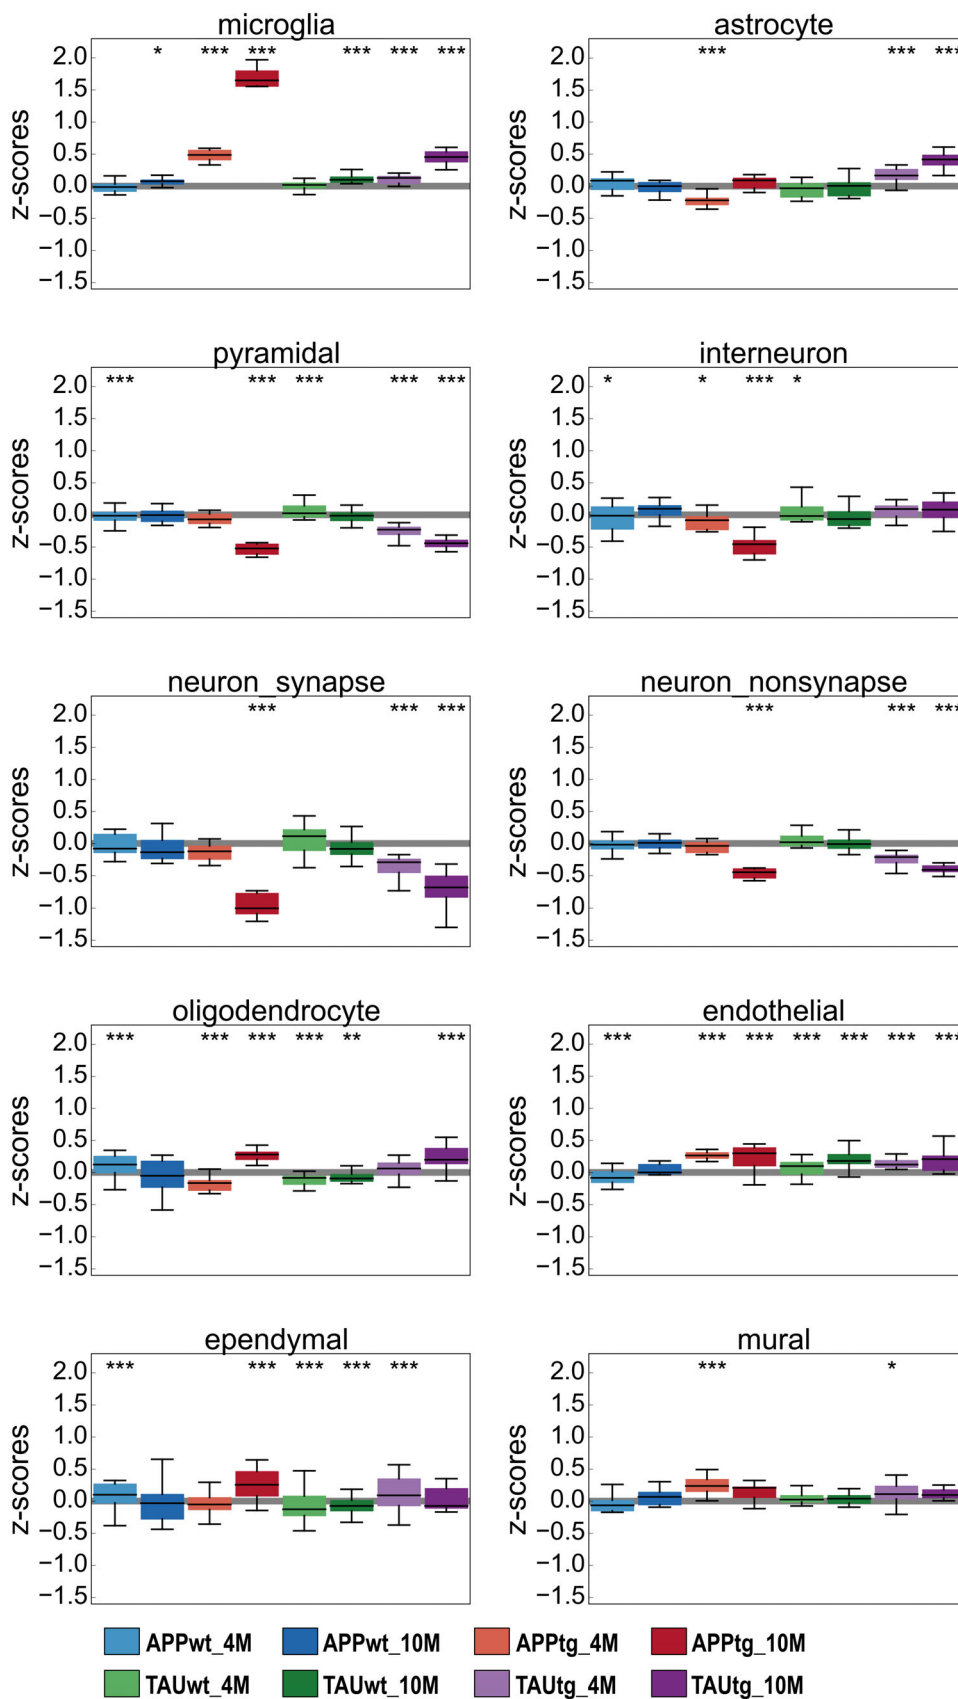

Figure EV1.

**Figure EV2. Expression of the top 18 genes in single microglia RNA-seq and publicly available data.**

- A Expression of the top 18 genes in the bulk RNA-seq dataset across the 8 experimental groups. Boxplots: center line, median; box limits, 25<sup>th</sup>–75<sup>th</sup> quartiles; and whiskers, 1.5× interquartile range.
- B Scaled expression of our top 18 genes in the single microglia RNA-seq dataset, highlighting that *Clu*, *Gpc2*, and *Trem12* are very sparsely expressed by microglia. Expression values are scaled from 0 to 1. The insert on the far right is a duplicate of Fig 6A to help locate the expression of specific genes to particular clusters.
- C Compilation of publicly available data and the bulk and single microglia sequencing from the current study. Whereas bulk RNA-seq of mouse models (rows 1–3) and AD patients (row 12–16) demonstrates increased expression in the top 18 transcripts, RNA-seq of isolated microglia (rows 8–11) or single cell RNA-seq (rows 4–7) demonstrates no alterations or slightly decreased expression of the top 18 genes.

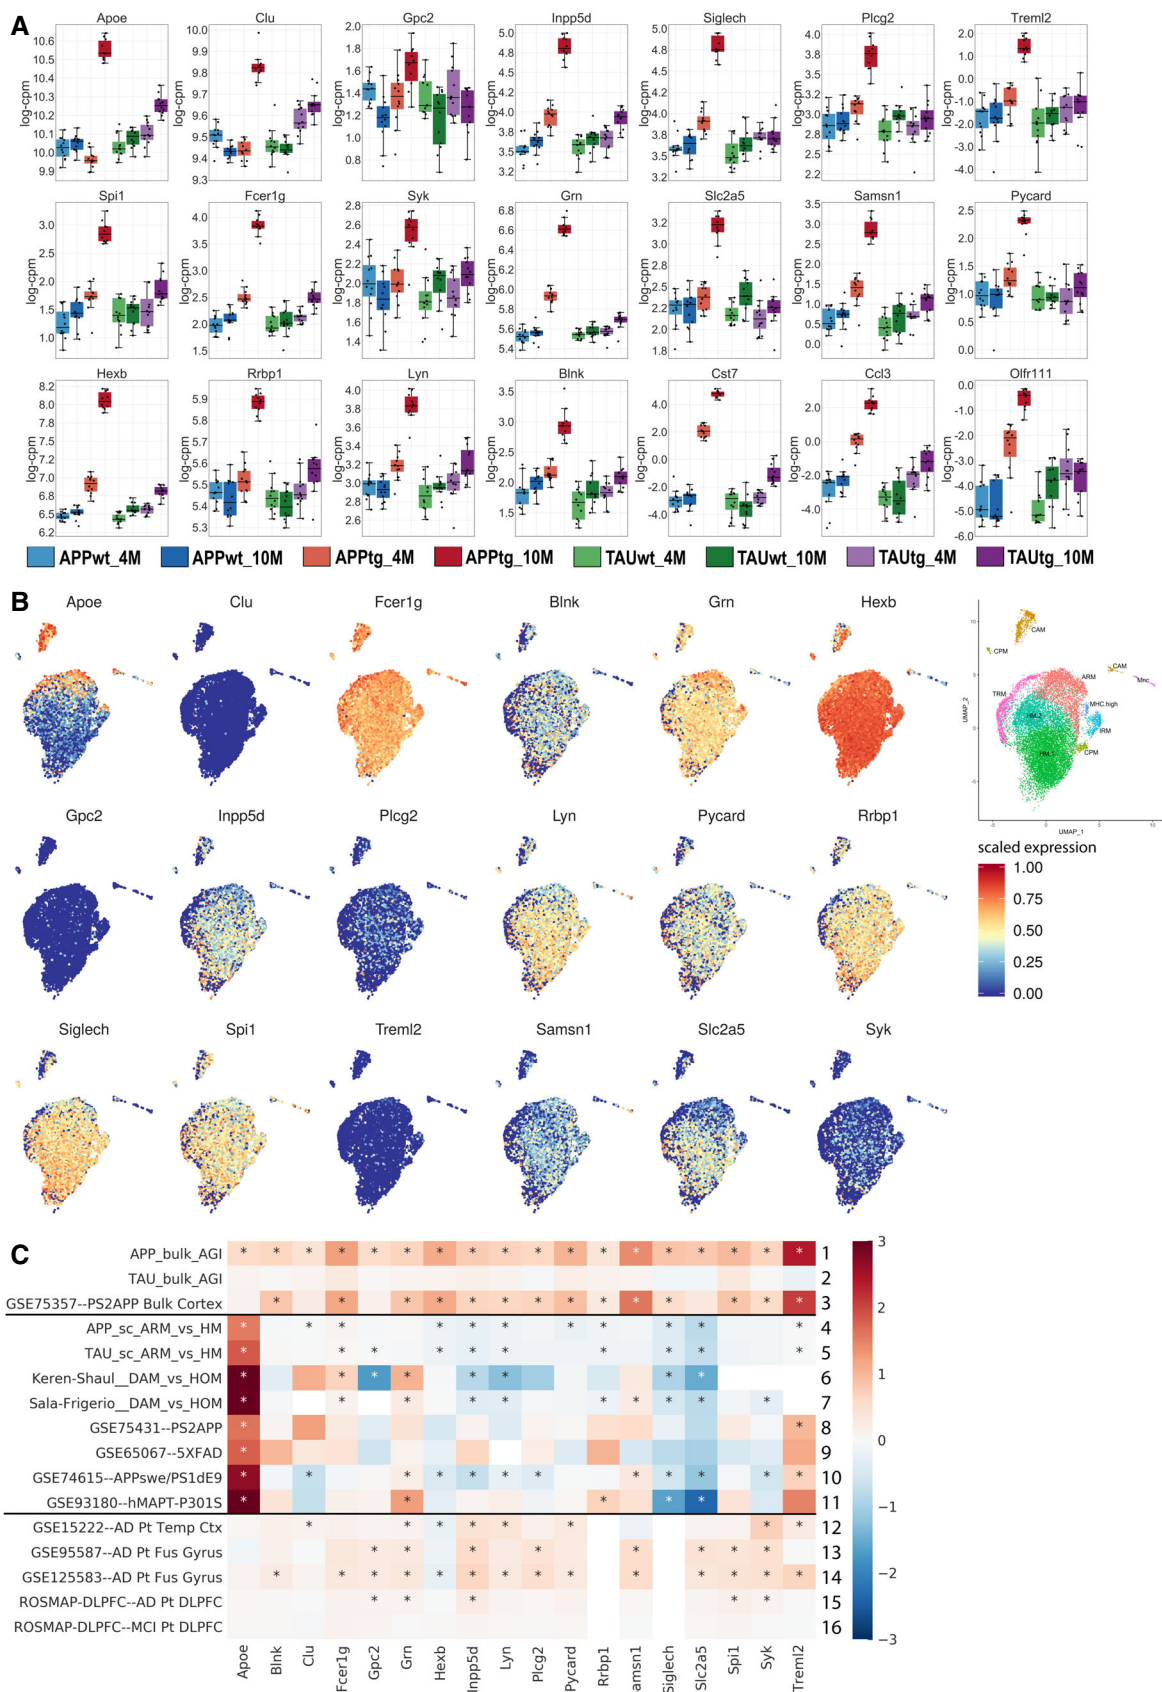

Figure EV2.

**Figure EV3. Examples of the predicted contribution of microglial expression of *ApoE* (A), *Clu* (B), and *Inpp5d* (C) to their observed expression in bulk.**

A–C For each gene, the different panels display i) the average expression of the specified gene in the single cell microglia RNA-seq for all microglia, homeostatic microglia (HM), and non-homeostatic microglia (ARM); ii) the predicted level of microgliosis in each experimental group, based on the average expression of the microglial gene set of Zeisel *et al* (2015), divided in the contribution of ARM and HM cells to the predicted microgliosis. As this prediction is not gene-dependent, graph ii is the same in panels A, B, and C; iii) the predicted microglial expression per microglial subtype multiplied with the degree of microgliosis; iv) linear regression on the predicted microglial expression as calculated in iii) and the observed bulk RNA-seq expression; and v) the observed bulk RNA-seq expression (in blue) per experimental group plotted side-by-side with the predicted microglial expression (in green) of that specific gene.

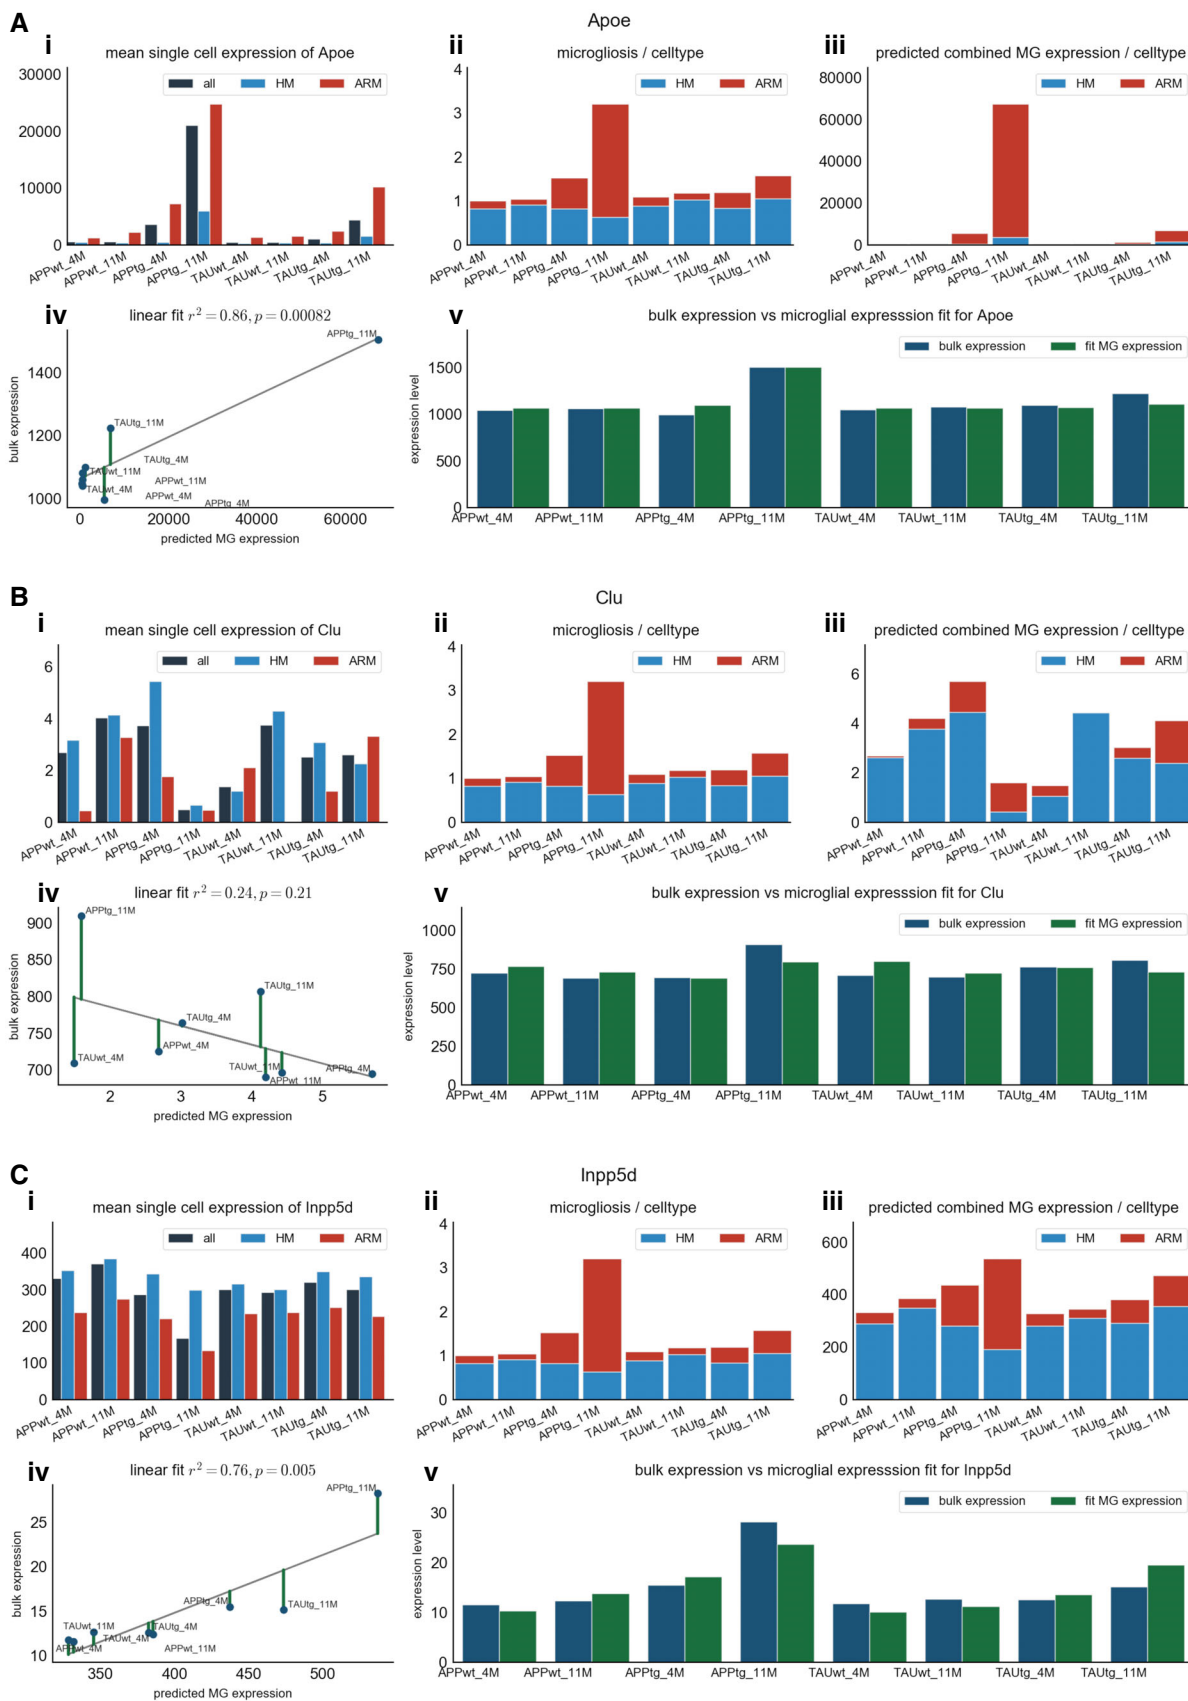

Figure EV3.
